# Supplementary material
Source: publisher figshare collection journal article supplement (https://acs.figshare.com/ndownloader/files/5193481)
Supplement: Supplementary file 1 [file 5193481]

  
data_030428a 
  
_audit_creation_method            SHELXL-97 
_chemical_name_systematic 
; 
 ? 
; 
_chemical_name_common             ? 
_chemical_melting_point           ? 
_chemical_formula_moiety          ? 
_chemical_formula_sum 
 'C13 H8 Ag F3 N4 O4 S' 
_chemical_formula_weight          481.16 
  
loop_ 
 _atom_type_symbol 
 _atom_type_description 
 _atom_type_scat_dispersion_real 
 _atom_type_scat_dispersion_imag 
 _atom_type_scat_source 
 'C'  'C'   0.0033   0.0016 
 'International Tables Vol C Tables 4.2.6.8 and 6.1.1.4' 
 'H'  'H'   0.0000   0.0000 
 'International Tables Vol C Tables 4.2.6.8 and 6.1.1.4' 
 'N'  'N'   0.0061   0.0033 
 'International Tables Vol C Tables 4.2.6.8 and 6.1.1.4' 
 'O'  'O'   0.0106   0.0060 
 'International Tables Vol C Tables 4.2.6.8 and 6.1.1.4' 
 'F'  'F'   0.0171   0.0103 
 'International Tables Vol C Tables 4.2.6.8 and 6.1.1.4' 
 'S'  'S'   0.1246   0.1234 
 'International Tables Vol C Tables 4.2.6.8 and 6.1.1.4' 
 'Ag'  'Ag'  -0.8971   1.1015 
 'International Tables Vol C Tables 4.2.6.8 and 6.1.1.4' 
  
_symmetry_cell_setting            Monoclinic 
_symmetry_space_group_name_H-M    P2(1)/c 
  
loop_ 
 _symmetry_equiv_pos_as_xyz 
 'x, y, z' 
 '-x, y+1/2, -z+1/2' 
 '-x, -y, -z' 
 'x, -y-1/2, z-1/2' 
  
_cell_length_a                    5.536(4) 
_cell_length_b                    16.555(8) 
_cell_length_c                    16.677(8) 
_cell_angle_alpha                 90.00 
_cell_angle_beta                  95.475(13) 
_cell_angle_gamma                 90.00 
_cell_volume                      1521.6(15) 
_cell_formula_units_Z             4 
_cell_measurement_temperature     293(2) 
_cell_measurement_reflns_used     765 
_cell_measurement_theta_min       3.48 
_cell_measurement_theta_max       21.73 
  
_exptl_crystal_description        ? 
_exptl_crystal_colour             ? 
_exptl_crystal_size_max           0.20 
_exptl_crystal_size_mid           0.10 
_exptl_crystal_size_min           0.08 
_exptl_crystal_density_meas       NONE 
_exptl_crystal_density_diffrn     2.100 
_exptl_crystal_density_method     'not measured' 
_exptl_crystal_F_000              944 
_exptl_absorpt_coefficient_mu     1.527 
_exptl_absorpt_correction_type    MULTI-SCAN 
_exptl_absorpt_correction_T_min   0.709030 
_exptl_absorpt_correction_T_max   1.000000 
_exptl_absorpt_process_details    SADABS 
  
_exptl_special_details 
; 
 ? 
; 
  
_diffrn_ambient_temperature       293(2) 
_diffrn_radiation_wavelength      0.71073 
_diffrn_radiation_type            MoK\a 
_diffrn_radiation_source          'fine-focus sealed tube' 
_diffrn_radiation_monochromator   graphite 
_diffrn_measurement_device_type   'CCD area detector' 
_diffrn_measurement_method        'phi and omega scans' 
_diffrn_detector_area_resol_mean  ? 
_diffrn_standards_number          ? 
_diffrn_standards_interval_count  ? 
_diffrn_standards_interval_time   ? 
_diffrn_standards_decay_%         ? 
_diffrn_reflns_number             8557 
_diffrn_reflns_av_R_equivalents   0.0767 
_diffrn_reflns_av_sigmaI/netI     0.0971 
_diffrn_reflns_limit_h_min        -6 
_diffrn_reflns_limit_h_max        5 
_diffrn_reflns_limit_k_min        -16 
_diffrn_reflns_limit_k_max        20 
_diffrn_reflns_limit_l_min        -16 
_diffrn_reflns_limit_l_max        20 
_diffrn_reflns_theta_min          1.74 
_diffrn_reflns_theta_max          26.41 
_reflns_number_total              3108 
_reflns_number_gt                 1802 
_reflns_threshold_expression      >2sigma(I) 
  
_computing_data_collection        'Bruker SMART' 
_computing_cell_refinement        'Bruker SMART' 
_computing_data_reduction         'Bruker SAINT' 
_computing_structure_solution     'SHELXS-97 (Sheldrick, 1990)' 
_computing_structure_refinement   'SHELXL-97 (Sheldrick, 1997)' 
_computing_molecular_graphics     'Bruker SHELXTL' 
_computing_publication_material   'Bruker SHELXTL' 
  
_refine_special_details 
; 
 Refinement of F^2^ against ALL reflections.  The weighted R-factor wR and 
 goodness of fit S are based on F^2^, conventional R-factors R are based 
 on F, with F set to zero for negative F^2^. The threshold expression of 
 F^2^ > 2sigma(F^2^) is used only for calculating R-factors(gt) etc. and is 
 not relevant to the choice of reflections for refinement.  R-factors based 
 on F^2^ are statistically about twice as large as those based on F, and R- 
 factors based on ALL data will be even larger. 
; 
  
_refine_ls_structure_factor_coef  Fsqd 
_refine_ls_matrix_type            full 
_refine_ls_weighting_scheme       calc 
_refine_ls_weighting_details 
 'calc w=1/[\s^2^(Fo^2^)+(0.0254P)^2^+0.0000P] where P=(Fo^2^+2Fc^2^)/3' 
_atom_sites_solution_primary      direct 
_atom_sites_solution_secondary    difmap 
_atom_sites_solution_hydrogens    geom 
_refine_ls_hydrogen_treatment     mixed 
_refine_ls_extinction_method      none 
_refine_ls_extinction_coef        ? 
_refine_ls_number_reflns          3108 
_refine_ls_number_parameters      235 
_refine_ls_number_restraints      0 
_refine_ls_R_factor_all           0.1201 
_refine_ls_R_factor_gt            0.0546 
_refine_ls_wR_factor_ref          0.0919 
_refine_ls_wR_factor_gt           0.0777 
_refine_ls_goodness_of_fit_ref    1.014 
_refine_ls_restrained_S_all       1.014 
_refine_ls_shift/su_max           0.001 
_refine_ls_shift/su_mean          0.000 
  
loop_ 
 _atom_site_label 
 _atom_site_type_symbol 
 _atom_site_fract_x 
 _atom_site_fract_y 
 _atom_site_fract_z 
 _atom_site_U_iso_or_equiv 
 _atom_site_adp_type 
 _atom_site_occupancy 
 _atom_site_symmetry_multiplicity 
 _atom_site_calc_flag 
 _atom_site_refinement_flags 
 _atom_site_disorder_assembly 
 _atom_site_disorder_group 
Ag1 Ag -0.53769(9) 0.64971(3) 0.26457(3) 0.05194(18) Uani 1 1 d . . . 
N1 N -0.2485(8) 0.6586(3) 0.1865(2) 0.0377(11) Uani 1 1 d . . . 
N2 N 0.3269(8) 0.8293(3) 0.0671(2) 0.0405(12) Uani 1 1 d . . . 
N3 N 0.3416(8) 0.9135(3) 0.0625(2) 0.0388(12) Uani 1 1 d . . . 
N4 N -0.1748(8) 1.1211(3) 0.1615(2) 0.0353(11) Uani 1 1 d . . . 
O1 O 0.0209(6) 0.8818(2) 0.12450(19) 0.0320(9) Uani 1 1 d . . . 
C1 C -0.1552(10) 0.7289(3) 0.1672(3) 0.0340(13) Uani 1 1 d . . . 
H1 H -0.2247 0.7759 0.1851 0.041 Uiso 1 1 calc R . . 
C2 C 0.0411(9) 0.7358(3) 0.1218(3) 0.0302(13) Uani 1 1 d . . . 
C3 C 0.1392(11) 0.6660(3) 0.0950(3) 0.0479(16) Uani 1 1 d . . . 
H3 H 0.2708 0.6680 0.0643 0.057 Uiso 1 1 calc R . . 
C4 C 0.0416(12) 0.5936(4) 0.1138(4) 0.0587(19) Uani 1 1 d . . . 
H4 H 0.1060 0.5456 0.0961 0.070 Uiso 1 1 calc R . . 
C5 C -0.1525(12) 0.5922(3) 0.1591(3) 0.0468(16) Uani 1 1 d . . . 
H5 H -0.2191 0.5425 0.1711 0.056 Uiso 1 1 calc R . . 
C6 C 0.1399(9) 0.8142(3) 0.1042(3) 0.0304(12) Uani 1 1 d . . . 
C7 C 0.1591(9) 0.9414(3) 0.0973(3) 0.0292(12) Uani 1 1 d . . . 
C8 C -0.1037(9) 1.0445(3) 0.1511(3) 0.0345(13) Uani 1 1 d . . . 
H8 H -0.1873 1.0031 0.1741 0.041 Uiso 1 1 calc R . . 
C9 C 0.0880(9) 1.0247(3) 0.1077(3) 0.0272(12) Uani 1 1 d . . . 
C10 C 0.2137(10) 1.0862(3) 0.0736(3) 0.0364(14) Uani 1 1 d . . . 
H10 H 0.3434 1.0748 0.0438 0.044 Uiso 1 1 calc R . . 
C11 C 0.1424(10) 1.1641(3) 0.0847(3) 0.0414(15) Uani 1 1 d . . . 
H11 H 0.2239 1.2066 0.0627 0.050 Uiso 1 1 calc R . . 
C12 C -0.0499(10) 1.1794(3) 0.1286(3) 0.0391(14) Uani 1 1 d . . . 
H12 H -0.0954 1.2328 0.1358 0.047 Uiso 1 1 calc R . . 
S1 S 0.5448(3) 0.87916(9) 0.30250(9) 0.0417(4) Uani 1 1 d . . . 
O2 O 0.4055(8) 0.8103(2) 0.2767(2) 0.0646(12) Uani 1 1 d . . . 
O3 O 0.7983(8) 0.8671(3) 0.3094(3) 0.0858(16) Uani 1 1 d . . . 
O4 O 0.4650(9) 0.9524(3) 0.2657(2) 0.0759(14) Uani 1 1 d . . . 
C13 C 0.4812(13) 0.8914(4) 0.4061(4) 0.0489(16) Uani 1 1 d . . . 
F1 F 0.5364(9) 0.8272(3) 0.4496(2) 0.1059(17) Uani 1 1 d . . . 
F2 F 0.2499(7) 0.9050(2) 0.4138(2) 0.0790(12) Uani 1 1 d . . . 
F3 F 0.5951(9) 0.9522(3) 0.4407(2) 0.1128(17) Uani 1 1 d . . . 
  
loop_ 
 _atom_site_aniso_label 
 _atom_site_aniso_U_11 
 _atom_site_aniso_U_22 
 _atom_site_aniso_U_33 
 _atom_site_aniso_U_23 
 _atom_site_aniso_U_13 
 _atom_site_aniso_U_12 
Ag1 0.0442(3) 0.0578(3) 0.0569(3) 0.0090(3) 0.0206(2) -0.0092(3) 
N1 0.044(3) 0.032(3) 0.039(3) -0.001(2) 0.011(2) -0.007(2) 
N2 0.040(3) 0.038(3) 0.046(3) 0.003(2) 0.018(2) 0.004(2) 
N3 0.039(3) 0.038(3) 0.042(3) 0.005(2) 0.020(2) -0.002(2) 
N4 0.036(3) 0.030(3) 0.041(3) 0.000(2) 0.009(2) 0.002(2) 
O1 0.032(2) 0.033(2) 0.034(2) 0.0001(16) 0.0143(17) -0.0007(17) 
C1 0.040(4) 0.028(3) 0.036(3) -0.003(3) 0.014(3) 0.008(3) 
C2 0.032(3) 0.028(3) 0.032(3) -0.001(2) 0.010(2) 0.002(3) 
C3 0.049(4) 0.043(4) 0.055(4) -0.011(3) 0.024(3) 0.001(3) 
C4 0.078(5) 0.030(4) 0.072(5) -0.015(3) 0.027(4) 0.000(3) 
C5 0.063(5) 0.023(4) 0.055(4) -0.004(3) 0.010(3) -0.015(3) 
C6 0.033(3) 0.031(3) 0.028(3) -0.005(2) 0.009(2) 0.003(3) 
C7 0.025(3) 0.037(3) 0.027(3) 0.001(3) 0.007(2) -0.005(3) 
C8 0.031(3) 0.036(4) 0.037(3) 0.006(3) 0.008(2) -0.005(3) 
C9 0.023(3) 0.031(3) 0.029(3) 0.003(2) 0.007(2) -0.004(2) 
C10 0.031(3) 0.043(4) 0.037(3) 0.003(3) 0.009(2) -0.006(3) 
C11 0.045(4) 0.034(4) 0.046(3) 0.009(3) 0.013(3) -0.008(3) 
C12 0.043(4) 0.027(3) 0.046(3) 0.004(3) 0.002(3) 0.000(3) 
S1 0.0479(10) 0.0385(10) 0.0412(9) -0.0070(7) 0.0174(7) 0.0015(7) 
O2 0.076(3) 0.049(3) 0.070(3) -0.025(2) 0.013(2) -0.012(2) 
O3 0.047(3) 0.129(5) 0.084(3) -0.029(3) 0.023(2) 0.010(3) 
O4 0.124(4) 0.050(3) 0.060(3) 0.016(2) 0.039(2) 0.017(3) 
C13 0.064(5) 0.037(4) 0.048(4) 0.006(3) 0.016(3) 0.009(4) 
F1 0.166(5) 0.097(4) 0.061(3) 0.035(2) 0.045(3) 0.074(3) 
F2 0.069(3) 0.107(3) 0.066(2) 0.008(2) 0.036(2) 0.020(2) 
F3 0.139(4) 0.129(4) 0.075(3) -0.060(3) 0.037(3) -0.061(4) 
  
_geom_special_details 
; 
 All esds (except the esd in the dihedral angle between two l.s. planes) 
 are estimated using the full covariance matrix.  The cell esds are taken 
 into account individually in the estimation of esds in distances, angles 
 and torsion angles; correlations between esds in cell parameters are only 
 used when they are defined by crystal symmetry.  An approximate (isotropic) 
 treatment of cell esds is used for estimating esds involving l.s. planes. 
; 
  
loop_ 
 _geom_bond_atom_site_label_1 
 _geom_bond_atom_site_label_2 
 _geom_bond_distance 
 _geom_bond_site_symmetry_2 
 _geom_bond_publ_flag 
Ag1 N4 2.157(4) 2_445 ? 
Ag1 N1 2.163(4) . ? 
N1 C5 1.322(7) . ? 
N1 C1 1.325(6) . ? 
N2 C6 1.280(6) . ? 
N2 N3 1.399(6) . ? 
N3 C7 1.297(6) . ? 
N4 C12 1.335(6) . ? 
N4 C8 1.344(6) . ? 
N4 Ag1 2.157(4) 2_455 ? 
O1 C7 1.354(6) . ? 
O1 C6 1.356(6) . ? 
C1 C2 1.388(7) . ? 
C1 H1 0.9300 . ? 
C2 C3 1.368(7) . ? 
C2 C6 1.450(7) . ? 
C3 C4 1.365(8) . ? 
C3 H3 0.9300 . ? 
C4 C5 1.371(8) . ? 
C4 H4 0.9300 . ? 
C5 H5 0.9300 . ? 
C7 C9 1.449(7) . ? 
C8 C9 1.380(6) . ? 
C8 H8 0.9300 . ? 
C9 C10 1.387(7) . ? 
C10 C11 1.366(7) . ? 
C10 H10 0.9300 . ? 
C11 C12 1.372(7) . ? 
C11 H11 0.9300 . ? 
C12 H12 0.9300 . ? 
S1 O4 1.411(4) . ? 
S1 O3 1.412(5) . ? 
S1 O2 1.419(4) . ? 
S1 C13 1.807(6) . ? 
C13 F3 1.295(7) . ? 
C13 F1 1.307(6) . ? 
C13 F2 1.318(7) . ? 
  
loop_ 
 _geom_angle_atom_site_label_1 
 _geom_angle_atom_site_label_2 
 _geom_angle_atom_site_label_3 
 _geom_angle 
 _geom_angle_site_symmetry_1 
 _geom_angle_site_symmetry_3 
 _geom_angle_publ_flag 
N4 Ag1 N1 171.14(18) 2_445 . ? 
C5 N1 C1 117.9(5) . . ? 
C5 N1 Ag1 119.8(4) . . ? 
C1 N1 Ag1 122.3(4) . . ? 
C6 N2 N3 106.0(4) . . ? 
C7 N3 N2 106.1(4) . . ? 
C12 N4 C8 117.3(5) . . ? 
C12 N4 Ag1 121.0(4) . 2_455 ? 
C8 N4 Ag1 121.5(3) . 2_455 ? 
C7 O1 C6 102.4(4) . . ? 
N1 C1 C2 123.3(5) . . ? 
N1 C1 H1 118.4 . . ? 
C2 C1 H1 118.4 . . ? 
C3 C2 C1 117.7(5) . . ? 
C3 C2 C6 121.4(5) . . ? 
C1 C2 C6 120.9(5) . . ? 
C4 C3 C2 119.2(6) . . ? 
C4 C3 H3 120.4 . . ? 
C2 C3 H3 120.4 . . ? 
C3 C4 C5 119.3(5) . . ? 
C3 C4 H4 120.3 . . ? 
C5 C4 H4 120.3 . . ? 
N1 C5 C4 122.6(5) . . ? 
N1 C5 H5 118.7 . . ? 
C4 C5 H5 118.7 . . ? 
N2 C6 O1 113.2(4) . . ? 
N2 C6 C2 127.6(5) . . ? 
O1 C6 C2 119.1(4) . . ? 
N3 C7 O1 112.3(5) . . ? 
N3 C7 C9 128.6(5) . . ? 
O1 C7 C9 119.0(4) . . ? 
N4 C8 C9 122.8(5) . . ? 
N4 C8 H8 118.6 . . ? 
C9 C8 H8 118.6 . . ? 
C8 C9 C10 118.8(5) . . ? 
C8 C9 C7 121.4(4) . . ? 
C10 C9 C7 119.8(5) . . ? 
C11 C10 C9 118.3(5) . . ? 
C11 C10 H10 120.8 . . ? 
C9 C10 H10 120.8 . . ? 
C10 C11 C12 119.7(5) . . ? 
C10 C11 H11 120.1 . . ? 
C12 C11 H11 120.1 . . ? 
N4 C12 C11 123.0(5) . . ? 
N4 C12 H12 118.5 . . ? 
C11 C12 H12 118.5 . . ? 
O4 S1 O3 115.1(3) . . ? 
O4 S1 O2 114.8(3) . . ? 
O3 S1 O2 114.7(3) . . ? 
O4 S1 C13 103.8(3) . . ? 
O3 S1 C13 102.8(3) . . ? 
O2 S1 C13 103.3(3) . . ? 
F3 C13 F1 107.8(6) . . ? 
F3 C13 F2 105.1(5) . . ? 
F1 C13 F2 105.2(5) . . ? 
F3 C13 S1 112.5(5) . . ? 
F1 C13 S1 112.5(4) . . ? 
F2 C13 S1 113.1(4) . . ? 
  
loop_ 
 _geom_torsion_atom_site_label_1 
 _geom_torsion_atom_site_label_2 
 _geom_torsion_atom_site_label_3 
 _geom_torsion_atom_site_label_4 
 _geom_torsion 
 _geom_torsion_site_symmetry_1 
 _geom_torsion_site_symmetry_2 
 _geom_torsion_site_symmetry_3 
 _geom_torsion_site_symmetry_4 
 _geom_torsion_publ_flag 
N4 Ag1 N1 C5 -7.1(12) 2_445 . . . ? 
N4 Ag1 N1 C1 175.8(9) 2_445 . . . ? 
C6 N2 N3 C7 -0.4(6) . . . . ? 
C5 N1 C1 C2 -1.7(8) . . . . ? 
Ag1 N1 C1 C2 175.5(4) . . . . ? 
N1 C1 C2 C3 0.9(9) . . . . ? 
N1 C1 C2 C6 -178.4(5) . . . . ? 
C1 C2 C3 C4 -0.1(8) . . . . ? 
C6 C2 C3 C4 179.3(5) . . . . ? 
C2 C3 C4 C5 0.0(9) . . . . ? 
C1 N1 C5 C4 1.6(8) . . . . ? 
Ag1 N1 C5 C4 -175.6(5) . . . . ? 
C3 C4 C5 N1 -0.8(10) . . . . ? 
N3 N2 C6 O1 1.1(6) . . . . ? 
N3 N2 C6 C2 177.6(5) . . . . ? 
C7 O1 C6 N2 -1.4(6) . . . . ? 
C7 O1 C6 C2 -178.2(4) . . . . ? 
C3 C2 C6 N2 -3.4(9) . . . . ? 
C1 C2 C6 N2 175.9(5) . . . . ? 
C3 C2 C6 O1 172.9(5) . . . . ? 
C1 C2 C6 O1 -7.8(7) . . . . ? 
N2 N3 C7 O1 -0.5(6) . . . . ? 
N2 N3 C7 C9 -178.9(5) . . . . ? 
C6 O1 C7 N3 1.1(5) . . . . ? 
C6 O1 C7 C9 179.7(4) . . . . ? 
C12 N4 C8 C9 -0.7(7) . . . . ? 
Ag1 N4 C8 C9 -176.4(4) 2_455 . . . ? 
N4 C8 C9 C10 0.2(8) . . . . ? 
N4 C8 C9 C7 -179.7(4) . . . . ? 
N3 C7 C9 C8 -175.7(5) . . . . ? 
O1 C7 C9 C8 6.0(7) . . . . ? 
N3 C7 C9 C10 4.4(8) . . . . ? 
O1 C7 C9 C10 -173.9(4) . . . . ? 
C8 C9 C10 C11 0.3(7) . . . . ? 
C7 C9 C10 C11 -179.8(4) . . . . ? 
C9 C10 C11 C12 -0.2(8) . . . . ? 
C8 N4 C12 C11 0.8(8) . . . . ? 
Ag1 N4 C12 C11 176.5(4) 2_455 . . . ? 
C10 C11 C12 N4 -0.3(8) . . . . ? 
O4 S1 C13 F3 -60.2(6) . . . . ? 
O3 S1 C13 F3 60.1(6) . . . . ? 
O2 S1 C13 F3 179.7(5) . . . . ? 
O4 S1 C13 F1 177.8(5) . . . . ? 
O3 S1 C13 F1 -62.0(6) . . . . ? 
O2 S1 C13 F1 57.7(6) . . . . ? 
O4 S1 C13 F2 58.7(5) . . . . ? 
O3 S1 C13 F2 179.0(5) . . . . ? 
O2 S1 C13 F2 -61.4(5) . . . . ? 
  
_diffrn_measured_fraction_theta_max    0.998 
_diffrn_reflns_theta_full              26.41 
_diffrn_measured_fraction_theta_full   0.998 
_refine_diff_density_max    0.477 
_refine_diff_density_min   -0.459 
_refine_diff_density_rms    0.099 
